# Supplementary material
Source: PubMed Central journal article supplement (PMC2995118)
Supplement: supp_btq576_SupplementaryFile_1.pdf [file supp_btq576_SupplementaryFile_1.pdf]

# Identify functional miRNA-mRNA regulatory modules with correspondence latent dirichlet allocation

## Supplementary File 1

Bing Liu<sup>1,\*</sup>, Lin Liu<sup>1</sup>, Anna Tsykin<sup>2,3</sup>, Gregory J. Goodall<sup>2,4</sup>, Jeffrey E. Green<sup>5</sup>,  
Min Zhu<sup>5</sup>, Chang Hee Kim<sup>6</sup>, and Jiuyong Li<sup>1</sup>

<sup>1</sup>School of Computer and Information Science, University of South Australia, Mawson Lakes, SA 5095, Australia.

<sup>2</sup>Centre for Cancer Biology, SA Pathology, Adelaide, SA 5000, Australia

<sup>3</sup>School of Molecular & Biomedical Science, The University of Adelaide, Adelaide, SA 5005, Australia

<sup>4</sup>Department of Medicine, The University of Adelaide, Adelaide, SA 5005, Australia

<sup>5</sup>Laboratory of Cancer Biology and Genetics, National Cancer Institute, Bethesda, MD 20892, USA

<sup>6</sup>Laboratory of Molecular Technology, NCI-FCRDC, Frederick, MD 21702, USA

---

In this file, we provide supplementary information discussed in the Method and Results sections.

## 1. Methods

Given  $K$  functional modules, the generative procedure without the putative target constraint for each sample  $d$  is illustrated by the following sampling process:

1. Choose  $\bar{\theta}_d | \alpha \sim \text{Dir}(\alpha)$
2. Choose  $\bar{\varphi}_k | \beta \sim \text{Dir}(\beta)$
3. Choose  $\bar{\omega}_k | \gamma \sim \text{Dir}(\gamma)$
4. For each  $r_{d,n}$ ,  $n \in \{1, \dots, N_d\}$ :
  - a. Choose module  $z_{d,n} | \bar{\theta}_d \sim \text{Mult}(\theta_d)$
  - b. Choose a  $r_{d,n} | \{z_{d,n}, \varphi_{1:K}\} \sim \text{Mult}(\varphi_{z_{d,n}})$
5. For each  $g_{d,m}$ ,  $m \in \{1, \dots, M_d\}$ :
  - a. Choose miRNA index  $y_{d,m} | N \sim \text{Unif}\{1, \dots, N_d\}$
  - b. Choose  $g_{d,m} | \{y_{d,m}, \bar{z}, \omega_{1:K}\} \sim \text{Mult}(\omega_{z_{y_{d,m}}})$

Using Eq. (2), (3), (4), and (5), the Gibbs sampling procedure can be designed as Algorithm 1. The algorithm includes three stages: initialization, sampling, and reading out parameters.

---

### Algorithm 1: Gibbs sampling for FMRM discovery

---

#### Initialization

Assign zeros to all count variables,  $n_d^{(k)}$ ,  $n_d$ ,  $n_k^{(v)}$ ,  $n_k$ ,  $m_k^{(t)}$ ,  $m_k$   
foreach  $d \in \{1, \dots, D\}$  do

```

foreach miRNA  $r_{d,n}$ ,  $n \in \{1, \dots, N_d\}$  do
  sample FMRM index  $z_{d,n} = k \sim Mult(1/K)$ 
  increment sample-FMRM count:  $n_d^{(k)} + 1$ 
  increment sample-FMRM sum:  $n_d + 1$ 
  increment FMRM-miRNA count:  $n_k^{(v)} + 1$ 
  increment FMRM-miRNA sum:  $n_k + 1$ 
end for
foreach mRNA  $g_{d,m}$   $m \in [1, M_d]$  do
  sample index for FMRM index  $y_{d,m} = x \sim Uniform\{1, \dots, N_d\}$ 
  assign the FMRM  $k = z_{d,y_{d,m}}$  to mRNA  $g_{d,m}$ 
  increment FMRM-mRNA count:  $m_k^{(t)} + 1$ 
  increment FMRM-mRNA sum:  $m_k + 1$ 
end for
Gibbs sampling over burn-in period and sampling period
while not converge or not reach iteration limit do
  foreach  $d \in \{1, \dots, D\}$  do
    foreach miRNA  $r_{d,n}$ ,  $n \in \{1, \dots, N_d\}$  do
      *for the current assignment  $k$  to a miRNA term  $v$  indexed by miRNA  $r_{d,n}$ : decrement
      counts and sums:  $n_d^{(k)} - 1$ ,  $n_d - 1$ ,  $n_k^{(v)} - 1$ ,  $n_k - 1$ 
      *sample index  $x_{d,n} = x \sim Uniform\{1, \dots, M_d\}$  for mRNA  $g_{d,x_{d,n}}$ , which corresponding
      to miRNA  $r_{d,n}$ 
      *for the current assignment of  $k$  to a term  $t$  for mRNA  $g_{d,x_{d,n}}$ : decrement counts and
      sums:  $m_k^{(t)} - 1$ ,  $m_k - 1$ 
      *multinomial sampling according to Eq. (2), sample topic index
       $\hat{k} \sim p(z_{d,n} | Z_{-(d,n)}, Y_d, R_d, G_d)$ 
      *use the new assignment of  $z_{d,n} = \hat{k}$  to the miRNA term  $v$  for miRNA  $r_{d,n}$  and
      increment counts and sum:  $n_d^{(\hat{k})} + 1$ ,  $n_d + 1$ ,  $n_{\hat{k}}^{(v)} + 1$ ,  $n_{\hat{k}} + 1$ 
      *use the new assignment of  $z_{d,n} = \hat{k}$  to the term  $t$  for mRNA  $g_{d,x_{d,n}}$  and increment
      counts and sum:  $m_{\hat{k}}^{(t)} + 1$ ,  $m_{\hat{k}} + 1$ 
    end for
  end for
Check convergence and read out parameters
  If converged and L sampling iterations since last read out then
    read out parameter set  $\theta$ ,  $\Phi$ , and  $\Omega$  according to (3)
  end if
end while

```

---

## 2. Results

### 2.1. Materials and experiment data sets

The data sets are from Min Zhu et al. (Zhu, et al., 2010). The mRNA expression data were profiled with mouse genome 430A 2.0 GeneChip (Affymetrix) and scanned on Affymetrix GeneChip scanner 3000. The microRNA microarray chip (LMT\_miRNA\_v2 microarray) was designed using the Sanger miR9.0 database (<http://microrna.sanger.ac.uk>) and manufactured by Agilent Technologies as custom-synthesized 8 x 15k microarrays. The array contains 1667 unique mature miRNA sequences across all species, among them, 334 unique miRNAs were for mouse. Each mature miRNA is represented by + and - (reverse complement) strand sequences, and each with 4 replicate probes.

### miRNA gene expression data normalization

The gProcessSignal values of probes designed for mouse miRNAs were feature extracted using the GE2 protocol ([www.agilent.com](http://www.agilent.com)) with exclusion of internal control probes, non-mouse probes, and all negative strand probes. A global median normalization procedure was applied to the gProcessSignal values of the selected probes across all arrays.

### mRNA expression data normalization

mRNA array data were normalized using GC-RMA of Partek Genomic Suite ([www.partek.com](http://www.partek.com)). The normalized data was further filtered using MAS5 detection calls for probes designated as “P” (present) or “M” (Marginal) in less than 3 samples of all data population. Basal-luminal differential miRNAs and model-specific miRNA signatures were derived as described above.

### Sample information

The sample names and their corresponding mouse model class and tumor subtypes:

| Sample Name   | Mouse Model            | Model Class | Tumor Subtype |
|---------------|------------------------|-------------|---------------|
| X503_BT       | Brca1-/- p53 503 BT    | BRCA_p53    | Basal         |
| X4176_BT      | Brca1-/- p53 4176 BT   | BRCA_p53    | Basal         |
| X627_BT       | Brca1-/- p53 T627 BT   | BRCA_p53    | Basal         |
| X572_BT       | Brca1-/- p53 572 BT    | BRCA_p53    | Basal         |
| X53447_BT     | Brca1-/-p53447BT       | BRCA_p53    | Basal         |
| C3Tag_2       | C3TAg 2                | C3TAg       | Basal         |
| C3Tag_4       | C3TAg 4                | C3TAg       | Basal         |
| C3Tag_5       | C3TAg 5                | C3TAg       | Basal         |
| C3Tag_7       | C3TAg 7                | C3TAg       | Basal         |
| C3Tag_8       | C3TAg 8                | C3TAg       | Basal         |
| P53_1570      | p53-/- 1570R_PN1b      | p53         | Basal         |
| P53_2979      | p53-/- 2979R_PN1b      | p53         | Basal         |
| P53_5354      | p53-/- 5354L_PN10      | p53         | Basal         |
| P53_5809      | p53-/- 5809R_PN2(254c) | p53         | Basal         |
| P53_5817      | p53-/- 5817_PN2(254c)  | p53         | Basal         |
| P53_5851      | p53-/- 5851L_PN2(254c) | p53         | Basal         |
| P53_8546      | p53-/- 8546R_PN1b      | p53         | Basal         |
| Cmyc_043508   | C-Myc Tumor 043508     | C-Myc       | Luminal       |
| Cmyc_04004022 | C-Myc Tumor 04004022   | C-Myc       | Luminal       |
| Cmyc_04005648 | C-Myc Tumor 04005648   | C-Myc       | Luminal       |
| Cmyc_04004021 | C-Myc Tumor 04004021   | C-Myc       | Luminal       |
| H2N_Founder_A | MMTV-H2N Founder A     | H2N         | Luminal       |
| H2N_53        | MMTV-H2N 53            | H2N         | Luminal       |
| H2N_1         | MMTV-H2N 1             | H2N         | Luminal       |
| H2N_61        | MMTV-H2N 61            | H2N         | Luminal       |

| Sample Name | Mouse Model        | Model Class   | Tumor Subtype |
|-------------|--------------------|---------------|---------------|
| H2N_64      | MMTV-H2N 64        | H2N           | Luminal       |
| Hras_1.4    | MMTV-Haras An #1-4 | Hras          | Luminal       |
| Hras_3.4    | MMTV-Haras An #3-4 | Hras          | Luminal       |
| Hras_5.4    | MMTV-Haras An #5-4 | Hras          | Luminal       |
| Hras_4.4    | MMTV-Haras An #4-4 | Hras          | Luminal       |
| Hras_2.4    | MMTV-Haras An #2-4 | Hras          | Luminal       |
| PyMT_436    | PyMT 436           | MMTV_PyMT     | Luminal       |
| PyMT_437    | PyMT 437           | MMTV_PyMT     | Luminal       |
| MMTV.11567  | MMTV-PymT #11567   | MMTV_PyMT     | Luminal       |
| MMTV.11568  | MMTV-PymT #11568   | MMTV_PyMT     | Luminal       |
| MMTV.11570  | MMTV-PymT #11570   | MMTV_PyMT     | Luminal       |
| MMTV.5.1    | MMTV-PymT #5-1     | MMTV_PyMT     | Luminal       |
| Wnt_4675    | MMTV-Wnt 4675      | MMTV-Wnt      | Luminal       |
| Wnt_4676    | MMTV-Wnt 4676      | MMTV-Wnt      | Luminal       |
| Wnt_4635    | MMTV-Wnt 4635      | MMTV-Wnt      | Luminal       |
| Wnt_4677    | MMTV-Wnt 4677      | MMTV-Wnt      | Luminal       |
| FVB_M1_2    | FVB pregnant M2-1  | NormalMammary | Normal        |
| FVB_M1_4    | FVB pregnant M4-1  | NormalMammary | Normal        |
| FVB_M1_1    | FVB pregnant M1-1  | NormalMammary | Normal        |
| FVB_M1_3    | FVB pregnant M3-1  | NormalMammary | Normal        |
| FVB_M1_5    | FVB pregnant M5-1  | NormalMammary | Normal        |

## 2.2. Target reconstruction

To investigate whether the miRNAs and mRNAs in each module are identified by chance, we randomly selected a group of miRNAs and a group of mRNAs from MicroCosm with the same numbers as those in the identified modules, and queried how many pairs they could be linked by MicroCosm. The distribution of the number of matched pairs was estimated by a simulation which was executed for 10,000 times. The estimated distribution (Figure S1) shows that the numbers of target relationship of the randomly chosen miRNAs and mRNAs are significantly different from those of the identified miRNAs and mRNAs in each module (p-value < 0.05). It indicates that the miRNAs and mRNAs in each module are not identified by chance.

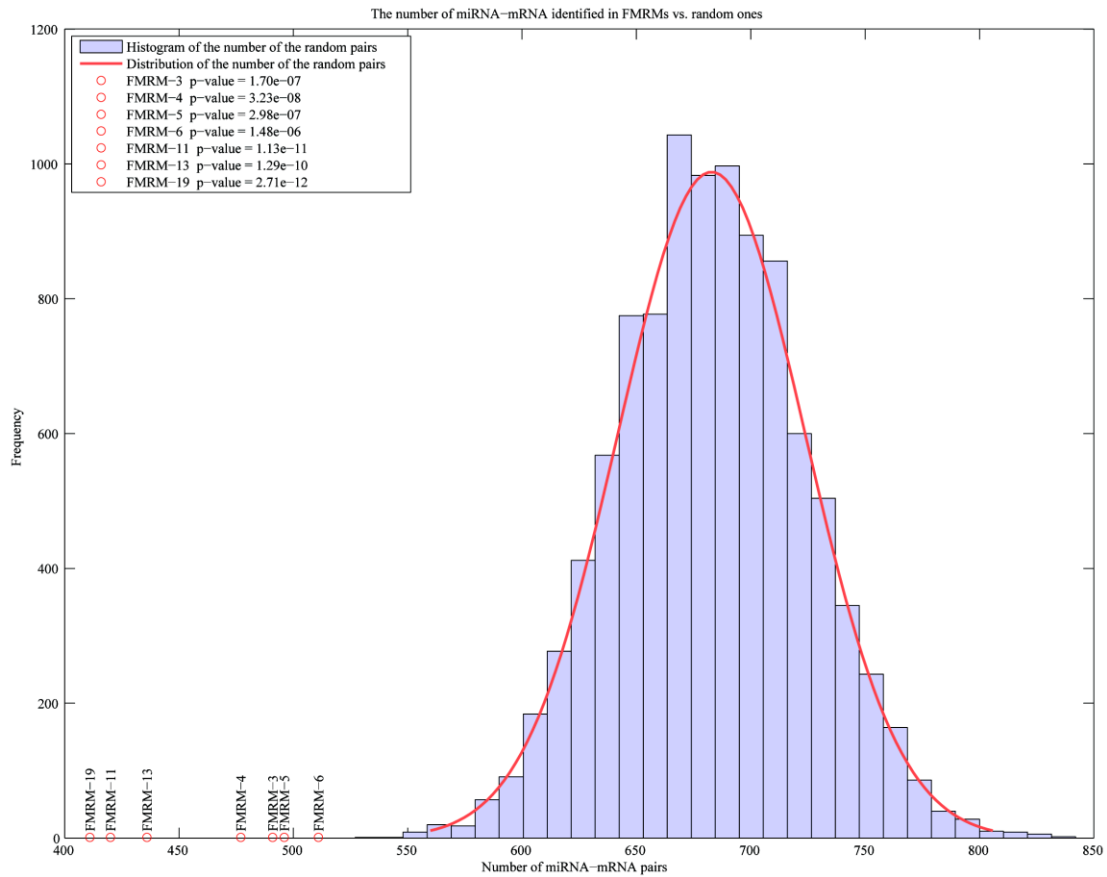

**Fig. S1.** Comparison of the numbers of miRNA-mRNA pairs in the identified modules with the ones from the random matching. The distribution of the number of matched target pairs is estimated by a simulation which was executed for 10,000 times. It indicates that the miRNAs and mRNAs identified in each module are not identified by chance.

### 2.3. Validation of identified mRNAs in the FMRMs

It is expected that the miRNA target genes are also relevant to the specific biological processes. In our results, 18 genes have been identified by Adelaide et al. (Adelaide, et al., 2007) as in Table S1.

**Table S1.** Validation of identified mRNAs in the FMRMs

| Gene   | Expression | Associated Type | Module  |
|--------|------------|-----------------|---------|
| Cct3   | Over       | Basal           | 1       |
| Upf2   | Over       | Basal           | 1       |
| Eif4a1 | Under      | Luminal         | 2,18,20 |
| Ccdc77 | Over       | Basal           | 3       |
| Rbm4b  | Over       | Luminal         | 3       |
| Hspa14 | Over       | Basal           | 4       |
| Rbx1   | Under      | Luminal         | 5,18    |
| Ppap2a | Under      | Basal           | 7       |
| Tpd52  | Over       | Luminal         | 8       |
| Tulp3  | Over       | Basal           | 9       |

|                |       |         |    |
|----------------|-------|---------|----|
| <b>Gpm6a</b>   | Under | Basal   | 10 |
| <b>Gdap1</b>   | Over  | Luminal | 10 |
| <b>Gspt1</b>   | Over  | Luminal | 11 |
| <b>Rbx1</b>    | Over  | Luminal | 12 |
| <b>Npy1r</b>   | Under | Basal   | 16 |
| <b>Rpl13</b>   | Under | Luminal | 18 |
| <b>Cox4i1</b>  | Under | Luminal | 19 |
| <b>Arfgef1</b> | Over  | Luminal | 20 |

Adelaide et al. (Adelaide, et al., 2007) suggest the existence of potential oncogenes and tumor suppressor genes differentially associated with the basal and luminal subtype. In our results, 18 genes identified in FMRMs are consistent with their results.

The networks which are explicitly associated with cancers and within the top five networks of each module are given in Table S2. The detailed networks are also given in Figure S2 to S6.

**Table S2.** Associated network functions of FMRMs

| <b>FMRM#</b> | <b>Associated Network Function</b>                                                | <b>Ref Figure</b> | <b>Score</b> |
|--------------|-----------------------------------------------------------------------------------|-------------------|--------------|
| <b>3</b>     | Cancer, Cellular Compromise, DNA Replication, and Repair                          | Fig. S2           | 12           |
| <b>3</b>     | Gene Expression, Cancer, Immunological Disease                                    | Fig. S3           | 12           |
| <b>4</b>     | Cellular Growth and Proliferation, Cancer, Dermatological Diseases and Conditions | Fig. S4           | 14           |
| <b>4</b>     | Cellular Assembly and Organization, Cancer, Cellular Development                  |                   | 2            |
| <b>13</b>    | Cancer, Cell Cycle, DNA Replication, Recombination, and Repair                    | Fig. S5           | 18           |
| <b>13</b>    | Cancer, Cell Morphology, Cellular Development                                     | Fig. S6           | 12           |
| <b>19</b>    | Cancer, Cell-To-Cell Signaling and Interaction, Cellular Function and Maintenance |                   | 2            |
| <b>19</b>    | Amino Acid Metabolism, Cancer, Cell Morphology                                    |                   | 2            |

The networks participated by the genes identified in FMRMs are highly related to cancers. The networks associated with cancers that are explicitly within the top five networks of each module are listed. It is worth noting that many mouse genes have been filtered out as we specifically target human breast cancers.

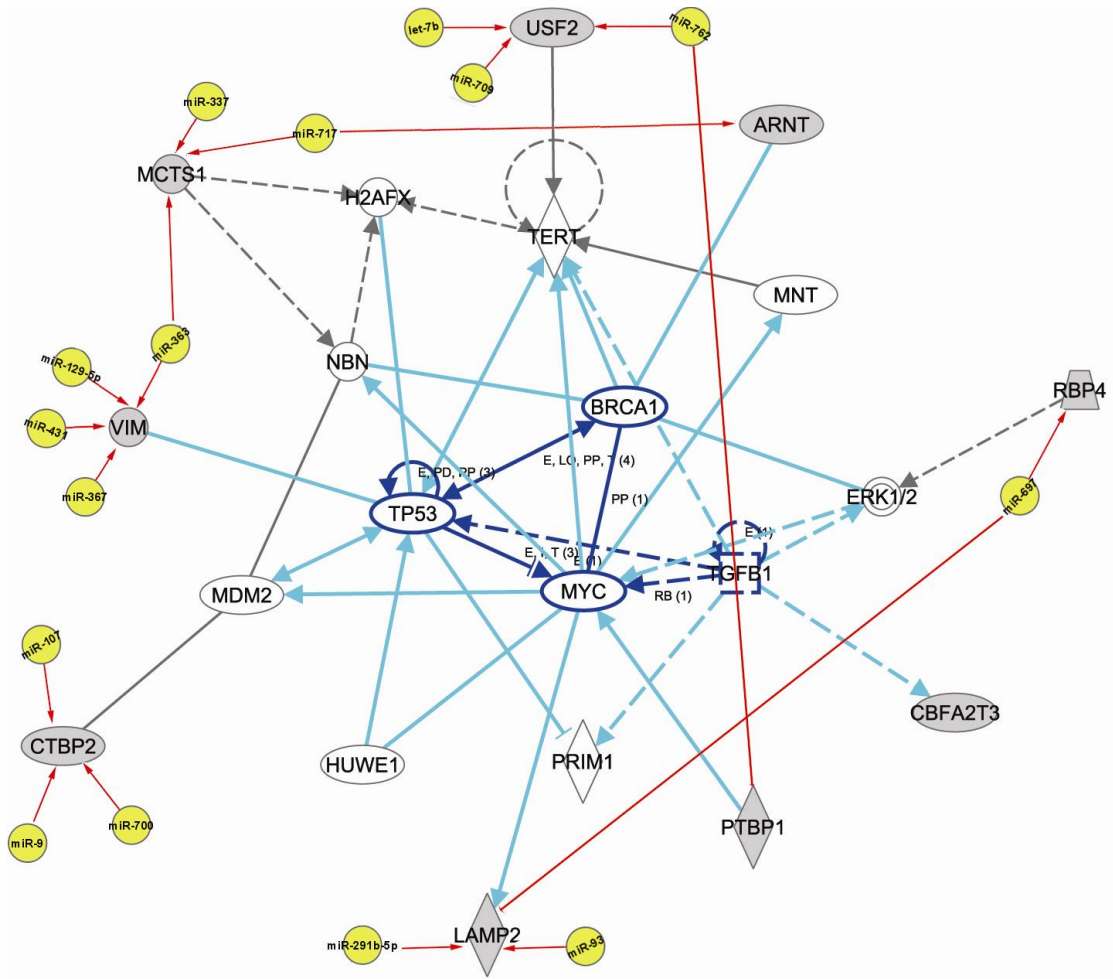

**Fig. S2.** Module-3 associated network functions. Cancer, Cellular Compromise, DNA Replication, and Repair

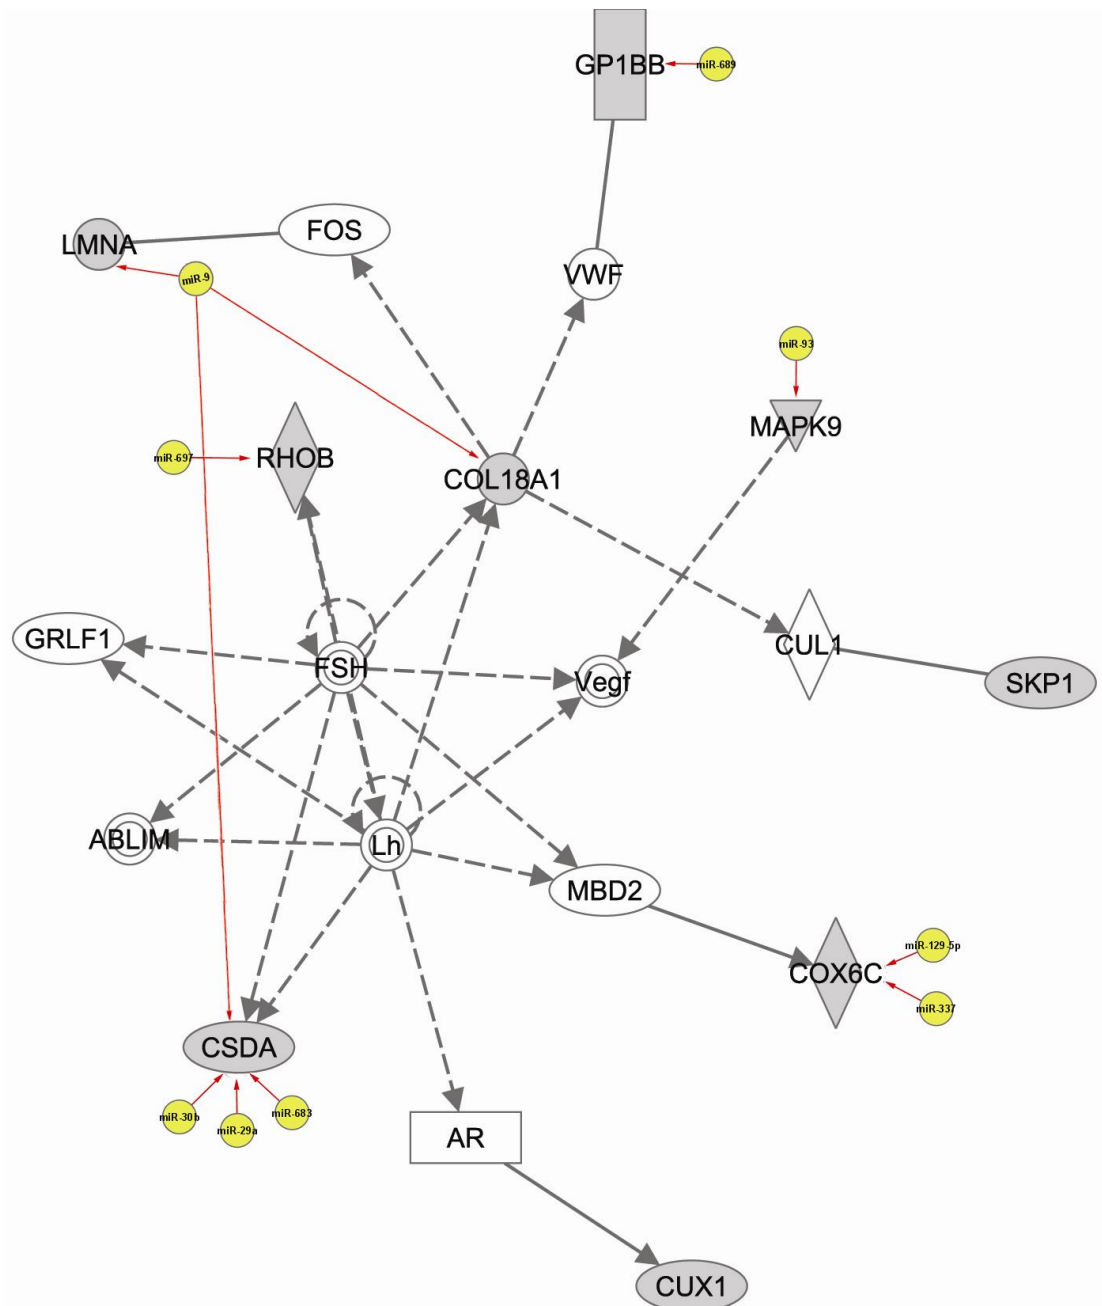

**Fig. S3.** Module-3 associated network functions. Gene Expression, Cancer, Immunological Disease



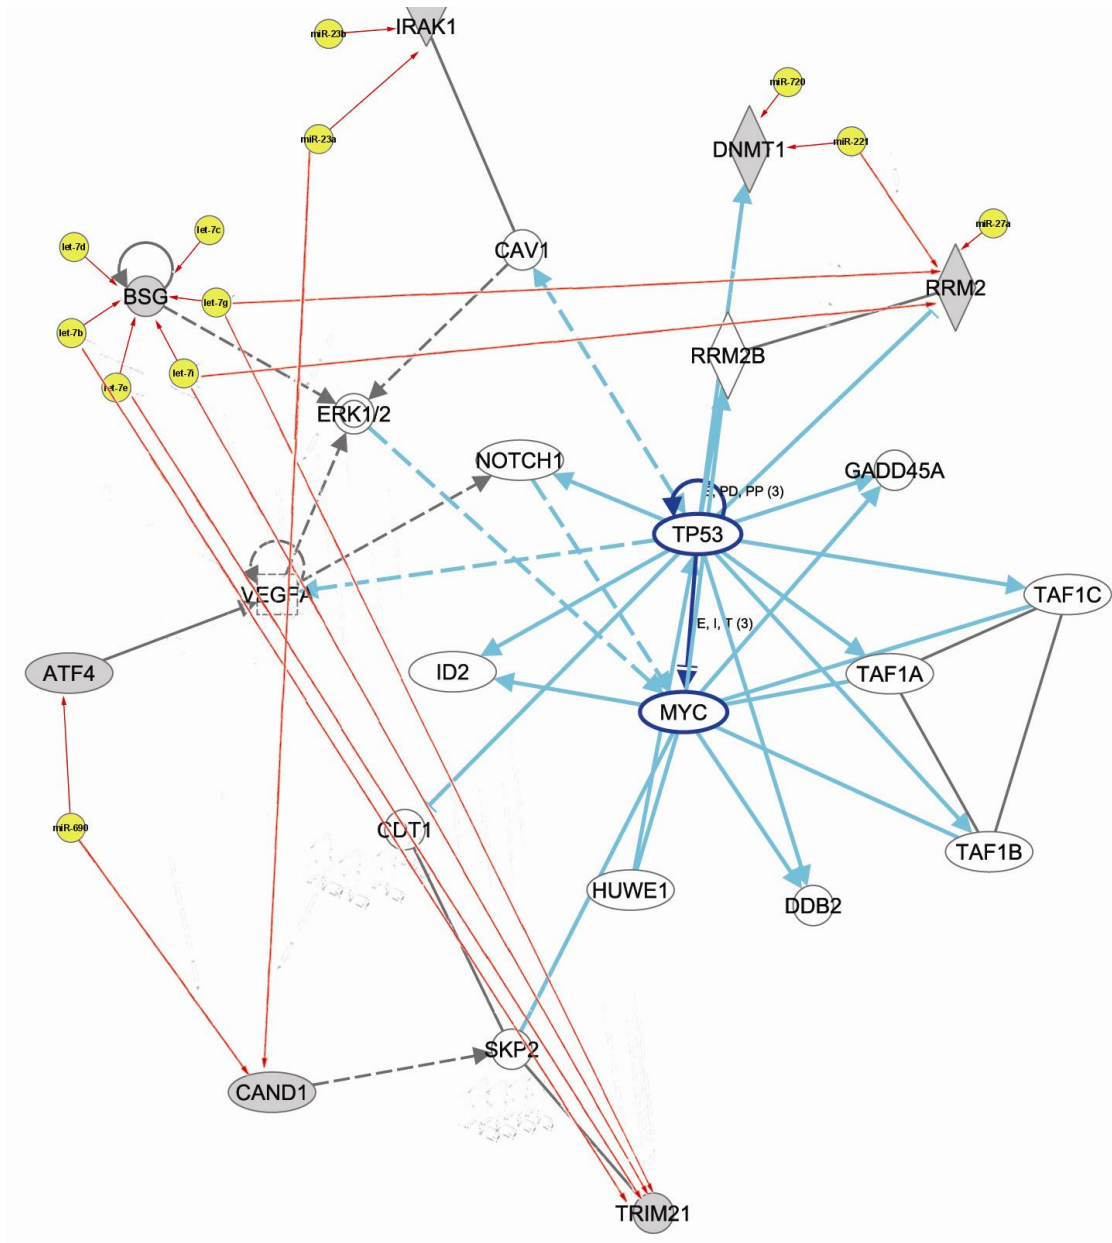

**Fig. S4.** Module-4 associated network functions. Cellular Growth and Proliferation, Cancer, Dermatological Diseases and Conditions

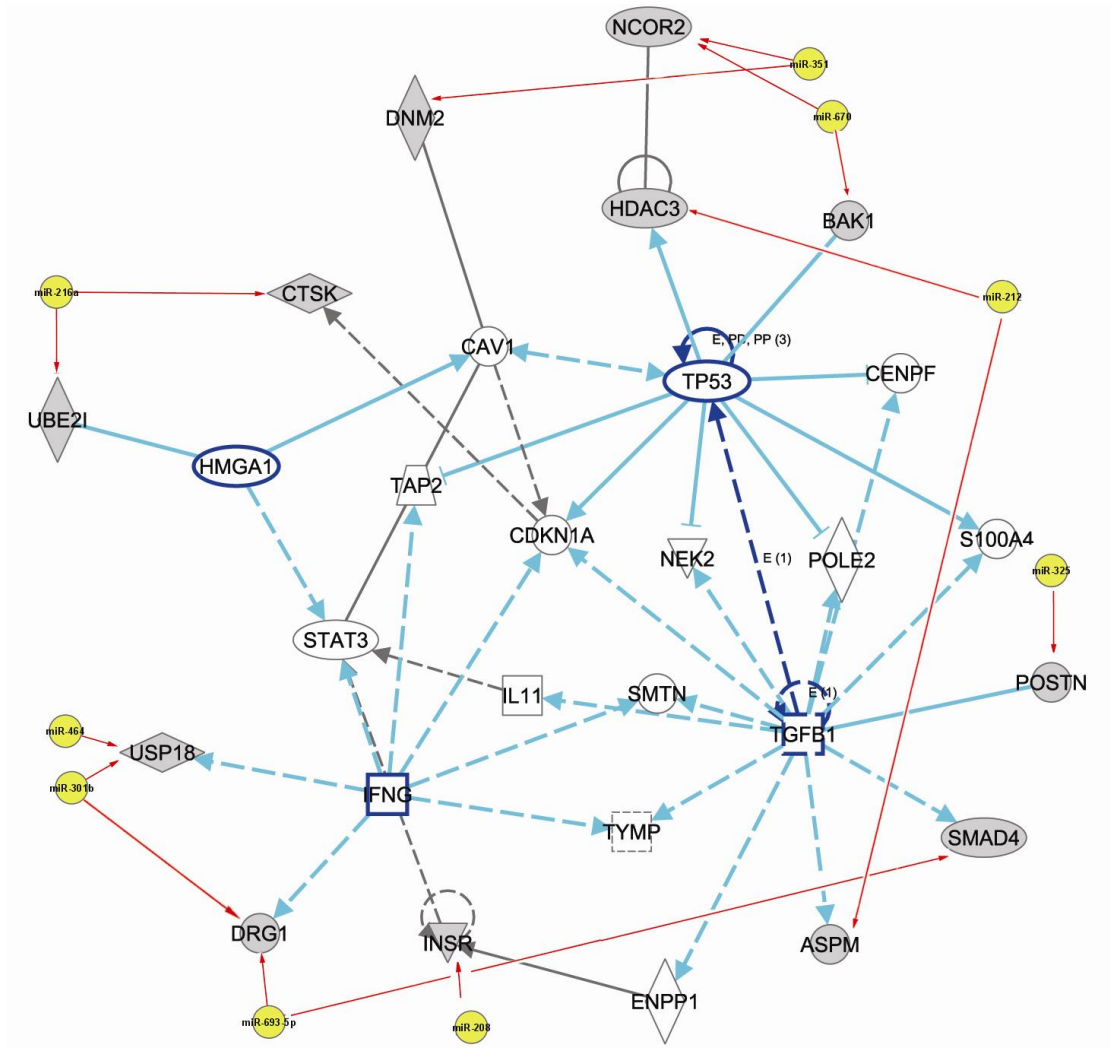

**Fig. S5.** Module-13 associated network functions. Cancer, Cell Cycle, DNA Replication, Recombination, and Repair

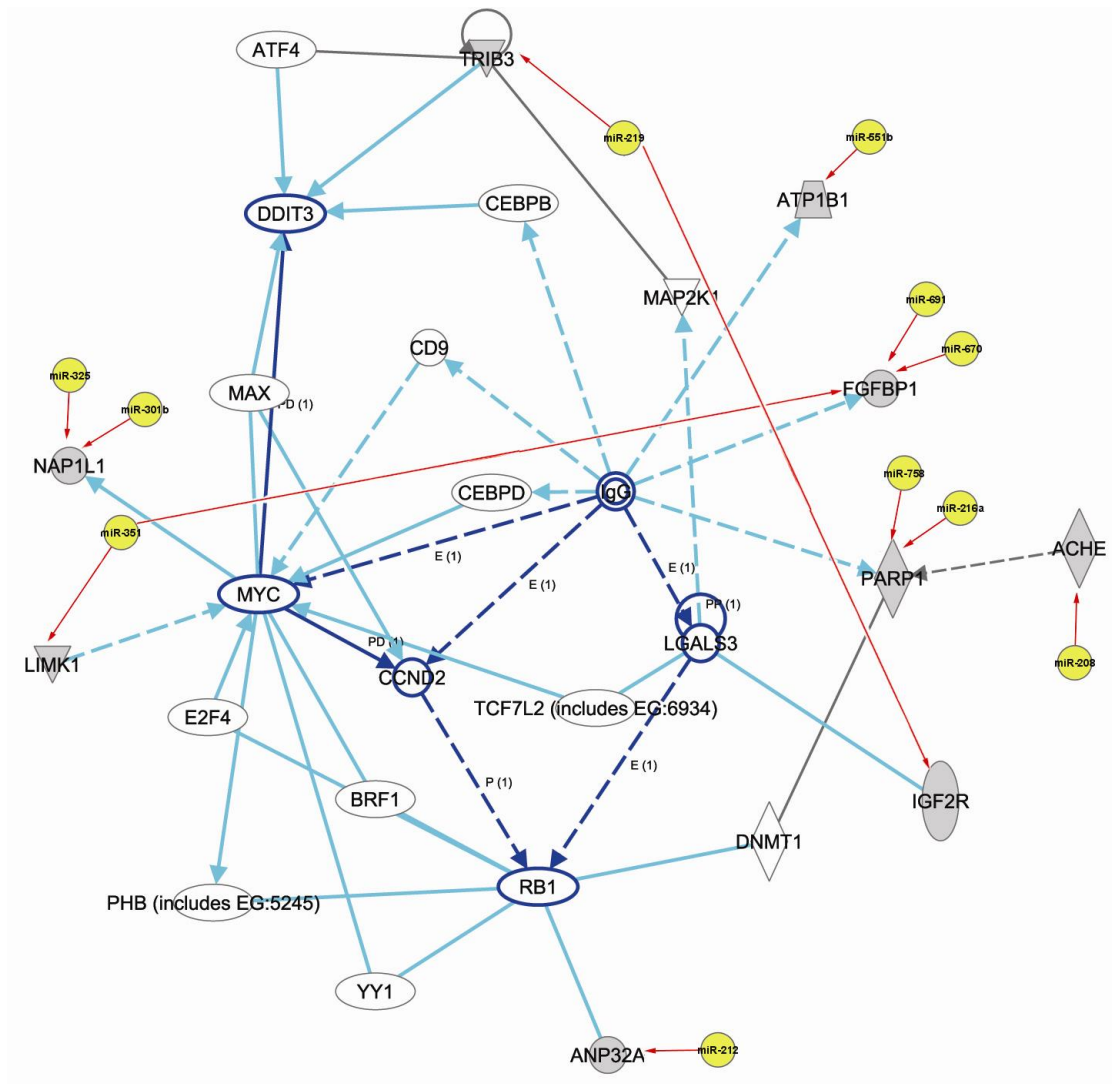

**Fig. S6.** Module-13 associated network functions. Cancer, Cell Morphology, Cellular Development

## Reference

- Adelaide, J., Finetti, P., Bekhouche, I., Repellini, L., Geneix, J., Sircoulomb, F., Charafe-Jauffret, E., Cervera, N., Desplans, J., Parzy, D., Schoenmakers, E., Viens, P., Jacquemier, J., Birnbaum, D., Bertucci, F. and Chaffanet, M. (2007) Integrated Profiling of Basal and Luminal Breast Cancers, *Cancer Res*, **67**, 11565-11575.
- Zhu, M., Yi, M., Kim, C.H., Deng, C., Li, Y., D.Medina, Hunter, K., Stephen, R. and Green, a.J. (2010) Comprehensive genomic profiling identifies miRNA signatures associated with mouse mammary tumor subtypes, *In Preparation*.
