# Supplementary material
Source: PubMed Central journal article supplement (PMC2995118)
Supplement: supp_btq576_SupplementaryFile_4.pdf [file supp_btq576_SupplementaryFile_4.pdf]

## MicroRNA --- implications for cancer

| miRNA                                                                                  | Dysregulation                                                                                                                       | Function                                        | Validated targets            | Oncogene (ONC) or tumour suppressor (TS) | Refs                                                                                             |
|----------------------------------------------------------------------------------------|-------------------------------------------------------------------------------------------------------------------------------------|-------------------------------------------------|------------------------------|------------------------------------------|--------------------------------------------------------------------------------------------------|
| <i>Let-7 (a, b, c, d, e, f, g, and i)</i>                                              | Loss in lung and breast cancer and in various solid and haematopoietic malignancies                                                 | Induces apoptosis and inhibits tumorigenesis    | RAS, MYC, and DNMTs          | TS                                       | (Johnson, 2007; Johnson, et al., 2005; Lee and Dutta, 2007; Sampson, et al., 2007)               |
| <i>miR-15a and miR-16-1</i>                                                            | Loss in CLL, prostate cancer and multiple myeloma                                                                                   | Induces apoptosis and inhibits tumorigenesis    | BCL2, WT1, RAB9B and MAGE83  | TS                                       | (Calin, 2002; Calin, et al., 2008; Calin, et al., 2005; Cimmino, et al., 2005)                   |
| <i>miR-17-5p</i>                                                                       |                                                                                                                                     |                                                 |                              | ONC                                      |                                                                                                  |
| <i>miR-17-92 cluster (miR-17, miR-18a, miR-19a, miR-20a, miR-19b-1, and miR-92a-1)</i> | Upregulated in lymphomas and in breast, lung, colon, stomach, and pancreatic cancers                                                | Induces proliferation                           | E2F1, BIM, and PTEN          | ONC                                      | (Mendell, 2008; Ventura, et al., 2008; Volinia, et al., 2006; Xiao, et al., 2008)                |
| <i>miR-21</i>                                                                          | Upregulated in glioblastomas, AML (11q23), aggressive CLL and breast, colon, pancreatic, lung, prostate, liver, and stomach cancers | Inhibits apoptosis and increases tumorigenicity | PTEN, PDCD4, TPM1, and TIMP3 | ONC                                      | (Ciafr, et al., 2005; Fanyin, et al., 2007; Garzon, et al., 2008; He, 2005; Iorio, et al., 2005) |
| <i>miR-29 (a, b, and c)</i>                                                            | Loss in aggressive CLL, AML and multiple myeloma                                                                                    | Induces apoptosis and inhibits tumorigenesis    | TCL1, MCL1, and BCL2         | TS                                       | (Calin, et al., 2005; Calin, et al., 2008; Calin, et al., 2005; Cimmino, et al., 2005)           |

| <b>miRNA</b>   | <b>Dysregulation</b>                                        | <b>Function</b>                                                                                                                                                                                                                                     | <b>Validated targets</b>             | <b>Oncogene (ONC) or tumour suppressor (TS)</b> | <b>Refs</b>                                                             |
|----------------|-------------------------------------------------------------|-----------------------------------------------------------------------------------------------------------------------------------------------------------------------------------------------------------------------------------------------------|--------------------------------------|-------------------------------------------------|-------------------------------------------------------------------------|
| <i>c)</i>      | (11q23), MDS lung and breast cancers and cholangiocarcinoma | inhibits tumorigenicity. Reactivates silenced tumour suppressor genes                                                                                                                                                                               | DNMTs                                |                                                 | 2005; Fabbri, et al., 2007; Mott, et al., 2007; Pekarsky, et al., 2006) |
| <i>miR-30c</i> |                                                             | Expression of miR-30c was validated in human HL-60 leukemia cells                                                                                                                                                                                   |                                      |                                                 | (Kasashima, et al., 2004)                                               |
| <i>miR-34</i>  | Loss in pancreatic, colon, breast, and liver cancers        | Induces apoptosis                                                                                                                                                                                                                                   | CDK4, CDK6, cyclin E2, EZF3, and MET | TS                                              | (Chang, et al., 2007; He, et al., 2007; Raver-Shapira, et al., 2007)    |
| <i>miR-103</i> |                                                             | Well-differentiated pancreatic endocrine carcinoma                                                                                                                                                                                                  |                                      |                                                 | (Roldo, et al., 2006)                                                   |
| <i>miR-141</i> |                                                             | Human microRNA-141 (miR-141), a member of the miR-200 family, has been reported to be associated with various human malignancies. miR-141 may be involved in the development of gastric cancer through its inhibitory effect on cell proliferation. |                                      |                                                 | (Du, et al., 2009)                                                      |
| <i>miR-143</i> |                                                             | Michael et al. subsequently verified expression of miR-143 in human, and                                                                                                                                                                            |                                      |                                                 | (Michael, et al., 2003)                                                 |

| miRNA                        | Dysregulation                                                                        | Function                                                                                                                                                                                                        | Validated targets | Oncogene (ONC) or tumour suppressor (TS) | Refs                                                              |
|------------------------------|--------------------------------------------------------------------------------------|-----------------------------------------------------------------------------------------------------------------------------------------------------------------------------------------------------------------|-------------------|------------------------------------------|-------------------------------------------------------------------|
|                              |                                                                                      | demonstrated significantly reduced levels of the miRNA in precancerous and neoplastic colorectal tissue [2]. miR-143 cloned in [3] has a 1 nt 3' extension (A), which is incompatible with the genome sequence. |                   |                                          |                                                                   |
| <i>miR-145</i>               | Loss in breast cancer                                                                | Inhibits proliferation and induces apoptosis of breast cancer cells                                                                                                                                             | ERG               | TS                                       | (Iorio, et al., 2005)                                             |
| <i>miR-146b</i>              |                                                                                      |                                                                                                                                                                                                                 |                   |                                          | (He, et al., 2005)                                                |
| <i>miR-155</i>               | Upregulated in aggressive CLL, Burkitt's lymphoma and lung, breast and colon cancers | Induces cell proliferation and leukaemia or lymphoma in mice                                                                                                                                                    | MAF and SHIP1     | ONC                                      | (Costinean, et al., 2006; Eis, et al., 2005)                      |
| <i>miR-181(a, b, and b1)</i> |                                                                                      | Glioblastoma, PTC                                                                                                                                                                                               |                   |                                          | (Ciafr, et al., 2005)                                             |
| <i>miR-199a</i>              |                                                                                      | Ovary, Cervical SSC                                                                                                                                                                                             |                   |                                          | (Iorio, et al., 2007)                                             |
| <i>miR-200 (a, b, c)</i>     |                                                                                      | EMT                                                                                                                                                                                                             | ZEB1,ZEB2         |                                          | (Gregory, et al., 2008; Korpil, et al., 2008; Park, et al., 2008) |
| <i>miR-204</i>               |                                                                                      | ALL                                                                                                                                                                                                             |                   |                                          | (Zanette, et al., 2007)                                           |
| <i>miR-205</i>               |                                                                                      | EMT                                                                                                                                                                                                             |                   |                                          | (Gregory, et al., 2008)                                           |
| <i>miR-221 and miR-</i>      | Loss in erythroblastic leukaemia                                                     | Inhibits proliferation in                                                                                                                                                                                       | KIT               | TS                                       | (Felli, et al.,                                                   |

| miRNA                      | Dysregulation                                                                     | Function                                                                         | Validated targets         | Oncogene (ONC) or tumour suppressor (TS) | Refs                                                                   |
|----------------------------|-----------------------------------------------------------------------------------|----------------------------------------------------------------------------------|---------------------------|------------------------------------------|------------------------------------------------------------------------|
| <i>222</i>                 |                                                                                   | erythroblasts                                                                    |                           |                                          | 2005)                                                                  |
| <i>miR-221 and miR-222</i> | Overexpression in aggressive CLL, thyroid carcinoma, and hepatocellular carcinoma | Promotes cell proliferation and inhibits apoptosis in various solid malignancies | P27, p57, PTEN, and TIMP3 | ONC                                      | (Fornari, et al., 2008; Garofalo, et al., 2009; le Sage, et al., 2007) |
| <i>miR-331</i>             |                                                                                   | ALL, CLL                                                                         |                           |                                          | (Zanette, et al., 2007)                                                |
| <i>miR-372 and miR-373</i> | Upregulated in testicular tumours                                                 | Promotes tumorigenicity in cooperation with RAS                                  | LATS2                     | ONC                                      | (Voorhoeve, et al., 2006)                                              |

## Reference

- Calin, G. (2002) Frequent deletions and down-regulation of micro-RNA genes miR15 and miR16 at 13q14 in chronic lymphocytic leukemia, *Proc Natl Acad Sci USA*, **99**, 15524 - 15529.
- Calin, G.A., Cimmino, A., Fabbri, M., Ferracin, M., Wojcik, S.E., Shimizu, M., Taccioli, C., Zanasi, N., Garzon, R., Aqeilan, R.I., Alder, H., Volinia, S., Rassenti, L., Liu, X., Liu, C.-g., Kipps, T.J., Negrini, M. and Croce, C.M. (2008) MiR-15a and miR-16-1 cluster functions in human leukemia, *Proceedings of the National Academy of Sciences*, **105**, 5166-5171.
- Calin, G.A., Ferracin, M., Cimmino, A., Di Leva, G., Shimizu, M., Wojcik, S.E., Iorio, M.V., Visone, R., Sever, N.I., Fabbri, M., Iuliano, R., Palumbo, T., Pichiorri, F., Roldo, C., Garzon, R., Sevignani, C., Rassenti, L., Alder, H., Volinia, S., Liu, C.-g., Kipps, T.J., Negrini, M. and Croce, C.M. (2005) A MicroRNA Signature Associated with Prognosis and Progression in Chronic Lymphocytic Leukemia, *N Engl J Med*, **353**, 1793-1801.
- Chang, T.-C., Wentzel, E.A., Kent, O.A., Ramachandran, K., Mullendore, M., Lee, K.H., Feldmann, G., Yamakuchi, M., Ferlito, M., Lowenstein, C.J., Arking, D.E., Beer, M.A., Maitra, A. and Mendell, J.T. (2007) Transactivation of miR-34a by p53 Broadly Influences Gene Expression and Promotes Apoptosis, **26**, 745-752.
- Ciafr, S.A., Galardi, S., Mangiola, A., Ferracin, M., Liu, C.G., Sabatino, G., Negrini, M., Maira, G., Croce, C.M. and Farace, M.G. (2005) Extensive modulation of a set of microRNAs in primary glioblastoma, *Biochemical and Biophysical Research Communications*, **334**, 1351-1358.

Cimmino, A., Calin, G.A., Fabbri, M., Iorio, M.V., Ferracin, M., Shimizu, M., Wojcik, S.E., Aqeilan, R.I., Zupo, S., Dono, M., Rassenti, L., Alder, H., Volinia, S., Liu, C.-g., Kipps, T.J., Negrini, M. and Croce, C.M. (2005) miR-15 and miR-16 induce apoptosis by targeting BCL2, *Proceedings of the National Academy of Sciences of the United States of America*, **102**, 13944-13949.

Costinean, S., Zanesi, N., Pekarsky, Y., Tili, E., Volinia, S., Heerema, N. and Croce, C.M. (2006) Pre-B cell proliferation and lymphoblastic leukemia/high-grade lymphoma in Eu-miR155 transgenic mice, **103**, 7024-7029.

Du, Y., Xu, Y., Ding, L., Yao, H., Yu, H., Zhou, T. and Si, J. (2009) Down-regulation of miR-141 in gastric cancer and its involvement in cell growth, *Journal of Gastroenterology*, **44**, 556-561.

Eis, P.S., Tam, W., Sun, L., Chadburn, A., Li, Z., Gomez, M.F., Lund, E. and Dahlberg, J.E. (2005) Accumulation of miR-155 and BIC RNA in human B cell lymphomas, *Proceedings of the National Academy of Sciences of the United States of America*, **102**, 3627-3632.

Fabbri, M., Garzon, R., Cimmino, A., Liu, Z., Zanesi, N., Callegari, E., Liu, S., Alder, H., Costinean, S., Fernandez-Cymering, C., Volinia, S., Guler, G., Morrison, C.D., Chan, K.K., Marcucci, G., Calin, G.A., Huebner, K. and Croce, C.M. (2007) MicroRNA-29 family reverts aberrant methylation in lung cancer by targeting DNA methyltransferases 3A and 3B, *Proceedings of the National Academy of Sciences*, **104**, 15805-15810.

Fanyin, M., Roger, H., Hania, W., Kalpana, G., Samson, T.J. and Tushar, P. (2007) MicroRNA-21 Regulates Expression of the PTEN Tumor Suppressor Gene in Human Hepatocellular Cancer, *Gastroenterology*, **133**, 647-658.

Felli, N., Fontana, L., Pelosi, E., Botta, R., Bonci, D., Facchiano, F., Liuzzi, F., Lulli, V., Morsilli, O., Santoro, S., Valtieri, M., Calin, G.A., Liu, C.-G., Sorrentino, A., Croce, C.M. and Peschle, C. (2005) MicroRNAs 221 and 222 inhibit normal erythropoiesis and erythroleukemic cell growth via kit receptor down-modulation, *Proceedings of the National Academy of Sciences of the United States of America*, **102**, 18081-18086.

Fornari, F., Gramantieri, L., Ferracin, M., Veronese, A., Sabbioni, S., Calin, G.A., Grazi, G.L., Giovannini, C., Croce, C.M., Bolondi, L. and Negrini, M. (2008) MiR-221 controls CDKN1C/p57 and CDKN1B/p27 expression in human hepatocellular carcinoma, *Oncogene*, **27**, 5651-5661.

Garofalo, M., Di Leva, G., Romano, G., Nuovo, G., Suh, S.-S., Ngankeu, A., Taccioli, C., Pichiorri, F., Alder, H., Secchiero, P., Gasparini, P., Gonelli, A., Costinean, S., Acunzo, M., Condorelli, G. and Croce, C.M. (2009) miR-221&222 Regulate TRAIL Resistance and Enhance Tumorigenicity through PTEN and TIMP3 Downregulation, **16**, 498-509.

Garzon, R., Volinia, S., Liu, C.-G., Fernandez-Cymering, C., Palumbo, T., Pichiorri, F., Fabbri, M., Coombes, K., Alder, H., Nakamura, T., Flomenberg, N., Marcucci, G., Calin, G.A., Kornblau, S.M., Kantarjian, H., Bloomfield, C.D., Andreeff, M. and Croce, C.M. (2008) MicroRNA signatures associated with cytogenetics and prognosis in acute myeloid leukemia, *Blood*, **111**, 3183-3189.

Gregory, P.A., Bert, A.G., Paterson, E.L., Barry, S.C., Tsykin, A., Farshid, G., Vadas, M.A., Khew-Goodall, Y. and Goodall, G.J. (2008) The miR-200 family and miR-205 regulate epithelial to mesenchymal transition by targeting ZEB1 and SIP1, *Nat Cell Biol*, **10**, 593-601.

He, H., Jazdzewski, K., Li, W., Liyanarachchi, S., Nagy, R., Volinia, S., Calin, G.A., Liu, C.-g., Franssila, K., Suster, S., Kloos, R.T., Croce, C.M. and de la Chapelle, A. (2005) The role of microRNA genes in papillary thyroid carcinoma, *Proceedings of the National Academy of Sciences of the United States of America*, **102**, 19075-19080.

He, L. (2005) A microRNA polycistron as a potential human oncogene, *Nature*, **435**, 828 - 833.

He, L., He, X., Lim, L.P., de Stanchina, E., Xuan, Z., Liang, Y., Xue, W., Zender, L., Magnus, J., Ridzon, D., Jackson, A.L., Linsley, P.S., Chen, C., Lowe, S.W., Cleary, M.A. and Hannon, G.J. (2007) A microRNA component of the p53 tumour suppressor network, *Nature*, **447**, 1130-1134.

Iorio, M.V., Ferracin, M., Liu, C.-G., Veronese, A., Spizzo, R., Sabbioni, S., Magri, E., Pedriali, M., Fabbri, M., Campiglio, M., Menard, S., Palazzo, J.P., Rosenberg, A., Musiani, P., Volinia, S., Nenci, I., Calin, G.A., Querzoli, P., Negrini, M. and Croce, C.M. (2005) MicroRNA Gene Expression Deregulation in Human Breast Cancer, *Cancer Res*, **65**, 7065-7070.

Iorio, M.V., Visone, R., Di Leva, G., Donati, V., Petrocca, F., Casalini, P., Taccioli, C., Volinia, S., Liu, C.-G., Alder, H., Calin, G.A., Menard, S. and Croce, C.M. (2007) MicroRNA Signatures in Human Ovarian Cancer, *Cancer Res*, **67**, 8699-8707.

Johnson, C. (2007) The let-7 microRNA represses cell proliferation, *Cancer Res*, **67**, 7713 - 7722.

Johnson, S.M., Grosshans, H., Shingara, J., Byrom, M., Jarvis, R., Cheng, A., Labourier, E., Reinert, K.L., Brown, D. and Slack, F.J. (2005) RAS Is Regulated by the let-7 MicroRNA Family, **120**, 635-647.

Kasashima, K., Nakamura, Y. and Kozu, T. (2004) Altered expression profiles of microRNAs during TPA-induced differentiation of HL-60 cells, *Biochemical and Biophysical Research Communications*, **322**, 403-410.

Korpala, M., Lee, E.S., Hu, G. and Kang, Y. (2008) The miR-200 family inhibits epithelial-mesenchymal transition and cancer cell migration by direct targeting of E-cadherin transcriptional repressors ZEB1 and ZEB2, *J. Biol. Chem.*, C800074200.

le Sage, C., Nagel, R., Egan, D.A., Schrier, M., Mesman, E., Mangiola, A., Anile, C., Maira, G., Mercatelli, N., Ciafre, S.A., Farace, M.G. and Agami, R. (2007) Regulation of the p27Kip1 tumor suppressor by miR-221 and miR-222 promotes cancer cell proliferation, *EMBO J*, **26**, 3699-3708.

Lee, Y.S. and Dutta, A. (2007) The tumor suppressor microRNA let-7 represses the HMGA2 oncogene, *Genes & Development*, **21**, 1025-1030.

Mendell, J.T. (2008) miRiad Roles for the miR-17-92 Cluster in Development and Disease, **133**, 217-222.

Michael, M., O'Connor, S., Pellekaan, N., Young, G. and James, R. (2003) Reduced accumulation of specific mi-croRNAs in colorectal neoplasia, *Mol Cancer Res*, **1**, 882 - 891.

Mott, J.L., Kobayashi, S., Bronk, S.F. and Gores, G.J. (2007) mir-29 regulates Mcl-1 protein expression and apoptosis, *Oncogene*, **26**, 6133-6140.

Park, S.-M., Gaur, A.B., Lengyel, E. and Peter, M.E. (2008) The miR-200 family determines the epithelial phenotype of cancer cells by targeting the E-cadherin repressors ZEB1 and ZEB2, *Genes & Development*, **22**, 894-907.

Pekarsky, Y., Santanam, U., Cimmino, A., Palamarchuk, A., Efanov, A., Maximov, V., Volinia, S., Alder, H., Liu, C.-G., Rassenti, L., Calin, G.A., Hagan, J.P., Kipps, T. and Croce, C.M. (2006) Tc11 Expression in Chronic Lymphocytic Leukemia Is Regulated by miR-29 and miR-181, *Cancer Res*, **66**, 11590-11593.

Raver-Shapira, N., Marciano, E., Meiri, E., Spector, Y., Rosenfeld, N., Moskovits, N., Bentwich, Z. and Oren, M. (2007) Transcriptional Activation of miR-34a Contributes to p53-Mediated Apoptosis, **26**, 731-743.

Roldo, C., Missiaglia, E., Hagan, J.P., Falconi, M., Capelli, P., Bersani, S., Calin, G.A., Volinia, S., Liu, C.-G., Scarpa, A. and Croce, C.M. (2006) MicroRNA Expression Abnormalities in Pancreatic Endocrine and Acinar Tumors Are Associated With Distinctive Pathologic Features and Clinical Behavior, *J Clin Oncol*, **24**, 4677-4684.

Sampson, V.B., Rong, N.H., Han, J., Yang, Q., Aris, V., Soteropoulos, P., Petrelli, N.J., Dunn, S.P. and Krueger, L.J. (2007) MicroRNA Let-7a Down-regulates MYC and Reverts MYC-Induced Growth in Burkitt Lymphoma Cells, *Cancer Res*, **67**, 9762-9770.

Ventura, A., Young, A.G., Winslow, M.M., Lintault, L., Meissner, A., Erkeland, S.J., Newman, J., Bronson, R.T., Crowley, D., Stone, J.R., Jaenisch, R., Sharp, P.A. and Jacks, T. (2008) Targeted Deletion Reveals Essential and Overlapping Functions of the miR-17-92 Family of miRNA Clusters, **132**, 875-886.

Volinia, S., Calin, G.A., Liu, C.-G., Ambs, S., Cimmino, A., Petrocca, F., Visone, R., Iorio, M., Roldo, C., Ferracin, M., Prueitt, R.L., Yanaihara, N., Lanza, G., Scarpa, A., Vecchione, A., Negrini, M., Harris, C.C. and Croce, C.M. (2006) A microRNA expression signature of human solid tumors defines cancer gene targets, *Proceedings of the National Academy of Sciences of the United States of America*, **103**, 2257-2261.

Voorhoeve, P.M., le Sage, C., Schrier, M., Gillis, A.J.M., Stoop, H., Nagel, R., Liu, Y.-P., van Duijse, J., Drost, J., Griekspoor, A., Zlotorynski, E., Yabuta, N., De Vita, G., Nojima, H., Looijenga, L.H.J. and Agami, R. (2006) A Genetic Screen Implicates miRNA-372 and miRNA-373 As Oncogenes in Testicular Germ Cell Tumors, **124**, 1169-1181.

Xiao, C., Srinivasan, L., Calado, D.P., Patterson, H.C., Zhang, B., Wang, J., Henderson, J.M., Kutok, J.L. and Rajewsky, K. (2008) Lymphoproliferative disease and autoimmunity in mice with increased miR-17-92 expression in lymphocytes, *Nat Immunol*, **9**, 405-414.

Zanette, D.L., Rivadavia, F., Molfetta, G.A., Barbuzano, F.G., Proto-Siqueira, R., Falcao, R.P., Zago, M.A. and Silva-Jr, W.A. (2007) miRNA expression profiles in chronic lymphocytic and acute lymphocytic leukemia, *Brazilian Journal of Medical and Biological Research*, **40**, 1435-1440.
